# Supplementary material
Source: publisher figshare collection journal article supplement (https://frontiersin.figshare.com/ndownloader/files/13302962)
Supplement: Supplementary file [file 13302962]

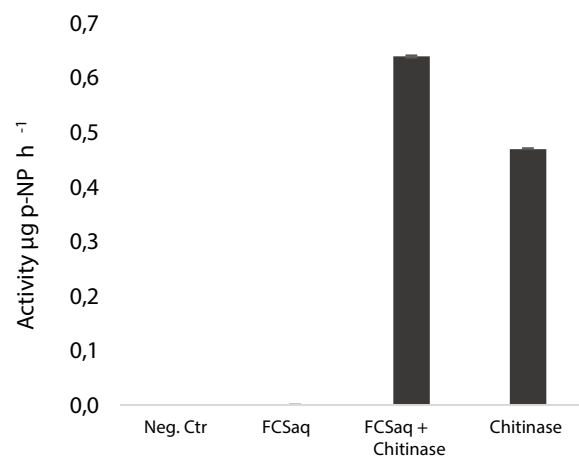

**Supplementary figure 1: FCS do not inhibit chitinase activity.**

Quantification of chitinase activity using para-nitrophenyl N-acetyl glucosaminide (p-NP-NAG) as substrate. Absorbance at 400 nm was used to determine the release of para nitrophenol (p-NP). Enzyme activity is expressed as µg of liberated p-NP per hour of incubation. Chitinase activity was evaluated in a chitinase solution and in the active aqueous fraction obtained after a 1-butanol extraction (FCSaq) incubated with chitinase. No activity was detected in the *Frankia* culture medium BAP (Neg. Ctr) or in FCSaq without chitinase.
